# Supplementary material for: Fluorescence-tunable copper nanoclusters and their application in hexavalent chromium sensing
Source: Royal Society of Chemistry journal article supplement (doi:10.1039/c9ra00916g), 2019-01-01
Supplement: c9ra00916g1.pdf [file c9ra00916g1.pdf]

## Supporting Information

### Fluorescent-tunable copper nanoclusters and their application in hexavalent chromium sensing

*Yu-Syuan Lin, Tai-Chia Chiu, and Cho-Chun Hu\**

#### 1 Supplementary Figures and Tables

##### 1.1 Supplementary Figures

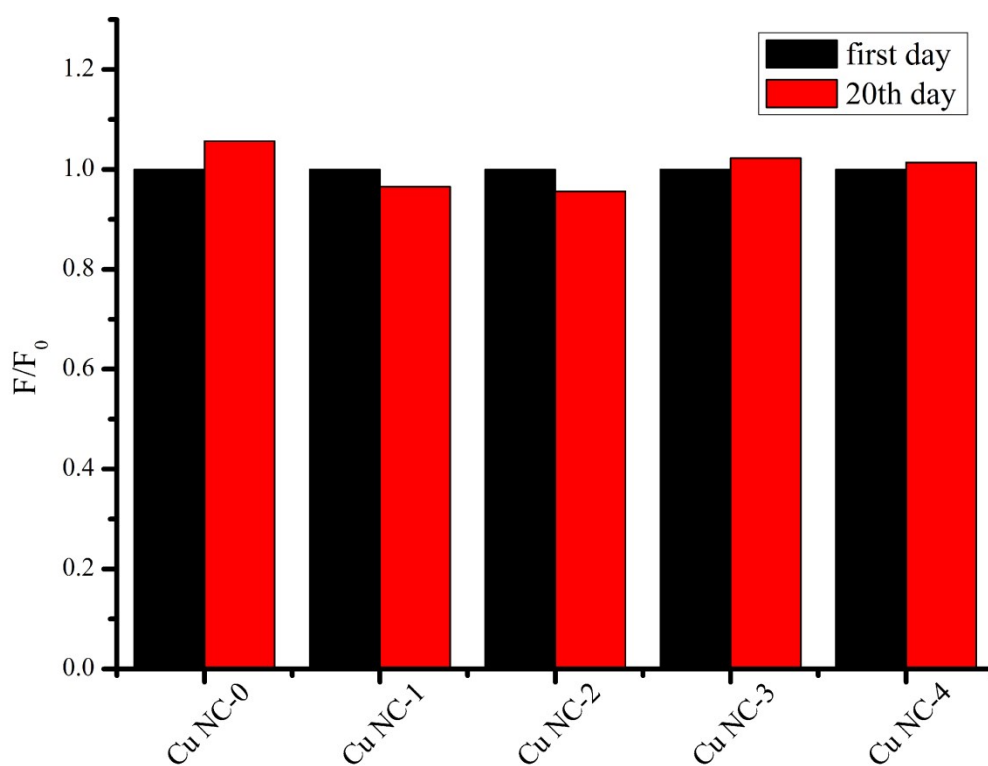

**Figure S1.** Stability of bi-ligand Cu NCs. Relative emission intensities ( $F/F_0$ ) of as-prepared Cu NC ( $F_0$ ) and stored for 20 days ( $F$ ).

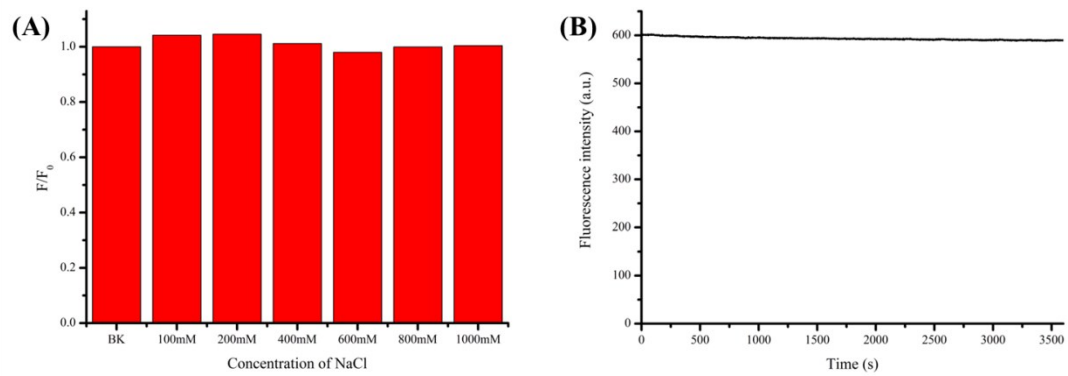

**Figure S2.** Salt tolerance and photostability of Cu NC-2. (A) Stability of Cu NC-2 in different concentrations of NaCl ranging from 100 mM to 1000 mM. (B) Photostability of Cu NC-2.

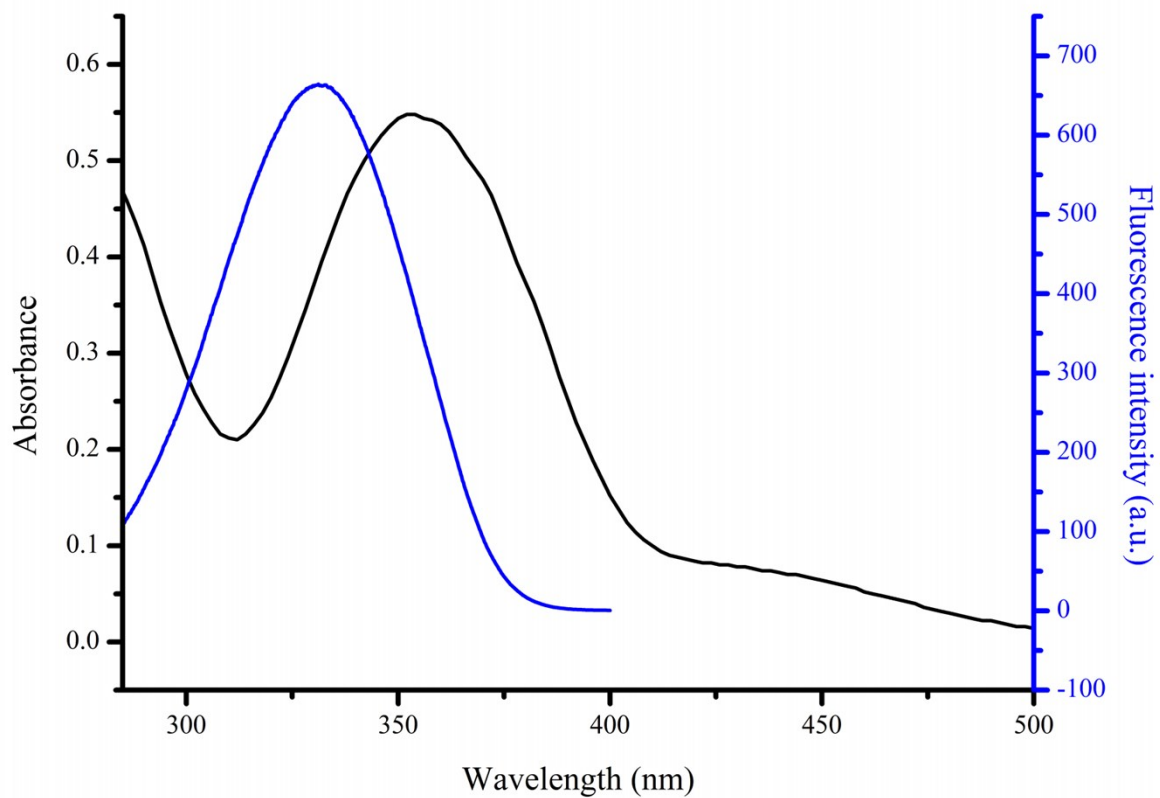

**Figure S3.** The correlation between Cu NC-2 and Cr(VI). The excitation spectrum of Cu NC-2 (blue line) and absorption spectrum of 0.02 M Cr(VI) (black line).

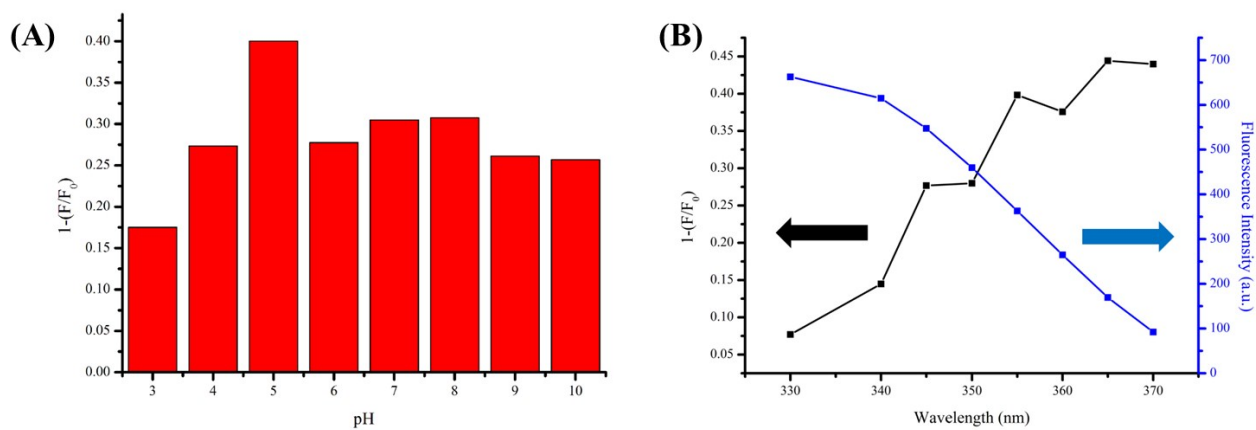

**Figure S4.** Optimization for Cr(VI) sensing. (A) Fluorescence intensities changes ( $1-F/F_0$ ) of Cu NC-2 after adding 1 mM Cr(VI) at different pH value. (B) Fluorescence intensity and Fluorescence intensity change ( $1-F/F_0$ ) of Cu NC-2 at various excitation wavelengths.

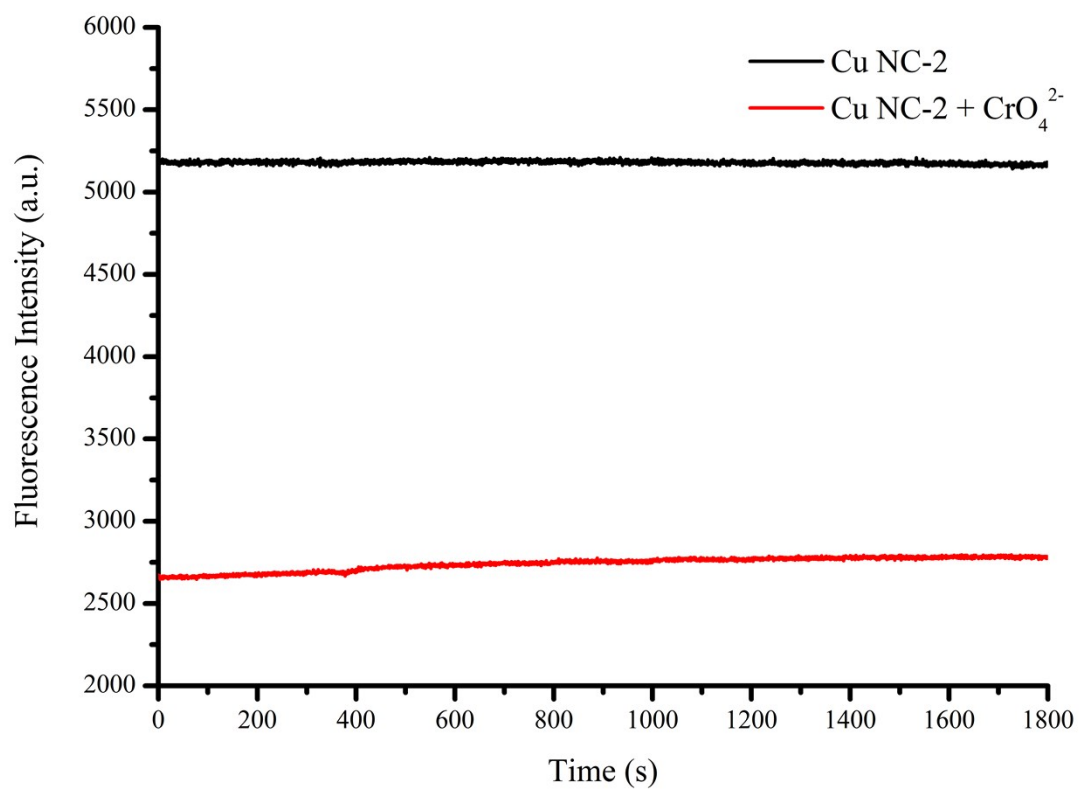

**Figure S5.** Photostability of Cu NC-2 with and without Cr(VI). Fluorescence time scan of Cu NC-2 (black line) and Cu NC-2 containing 0.1 mM of Cr(VI) (red line) at pH 5. The excitation wavelength was set at 355 nm.

## 1.2 Supplementary Tables

**Table S1.** Determination of Cr(VI) in mineral water using the present method. Each concentration of Cr(VI) in mineral water was tested for three times then the R.S.D. and recoveries have been calculated.

| Mineral water | Spiked Cr(VI)<br>[ $\mu\text{M}$ ] | Detected [ $\mu\text{M}$ ] | R.S.D. [%] | Recovery [%] |
|---------------|------------------------------------|----------------------------|------------|--------------|
| 1#            | 10                                 | 9.83                       | 2.06       | 98.3         |
|               | 14                                 | 13.83                      | 2.51       | 98.7         |
|               | 20                                 | 21.01                      | 4.54       | 105.0        |

**Table S2.** Comparison of the performance of the presented method with the some published analytical techniques for Cr(VI) detection.

| Method      | Sensor                                        | Linear range<br>/ $\mu\text{M}$ | Detection<br>limit / $\mu\text{M}$ | Ref.         |
|-------------|-----------------------------------------------|---------------------------------|------------------------------------|--------------|
| Colorimetry | GNRs                                          | 0.1–20                          | 0.088                              | 1            |
| Colorimetry | AA-AgNPs                                      | 0.08–1.84                       | 0.05                               | 2            |
| Colorimetry | DMSA-AuNPs                                    | 0.01–0.5                        | 0.01                               | 3            |
| Colorimetry | BSA-Au NPs<br>and HBr                         | 0.5–50                          | 0.28                               | 4            |
| Fluorimetry | CdTE@SiO <sub>2</sub><br>and RhB              | 0.02–0.3                        | 0.0062                             | 5            |
| Fluorimetry | SRBH                                          | 0.01–0.3                        | 0.0015                             | 6            |
| Fluorimetry | BHHABN                                        | 2.5–90                          | 0.36                               | 7            |
| Fluorimetry | N-GQDs                                        | 0.12–140                        | 0.04                               | 8            |
| Fluorimetry | Cys-Cu NCs                                    | 0.05–60                         | 0.043                              | 9            |
| Fluorimetry | G-C <sub>3</sub> N <sub>4</sub><br>nanosheets | 0.6–300                         | 0.15                               | 10           |
| Fluorimetry | BSA-Au NCs<br>and HBr                         | 0.001–2.5                       | 0.0006                             | 11           |
| Fluorimetry | bi-ligand Cu NC                               | 0.1–1000                        | 0.033                              | This<br>work |

## 2 References

- (1) Li, F. M.; Liu, J. M.; Wang, X. X.; Lin, L. P.; Cai, W. L.; Lin, X.; Zeng, Y. N.; Li, Z. M.; Lin, S. Q. Non-aggregation based label free colorimetric sensor for the detection of Cr (VI) based on selective etching of gold nanorods. *Sensors and Actuators B: Chemical* **2011**, *155*, 817-822.
- (2) Wu, X.; Xu, Y.; Dong, Y.; Jiang, X.; Zhu, N. Colorimetric determination of hexavalent chromium with ascorbic acid capped silver nanoparticles. *Analytical Methods* **2013**, *5*, 560-565.
- (3) Chen, W.; Cao, F.; Zheng, W.; Tian, Y.; Xianyu, Y.; Xu, P.; Zhang, W.; Wang, Z.; Deng, K.; Jiang, X. Detection of the nanomolar level of total Cr[(iii) and (vi)] by functionalized gold nanoparticles and a smartphone with the assistance of theoretical calculation models. *Nanoscale* **2015**, *7*, 2042-2049.
- (4) Guo, J. F.; Huo, D.-Q.; Yang, M.; Hou, C.-J.; Li, J.-J.; Fa, H.-B.; Luo, H.-B.; Yang, P. Colorimetric detection of Cr (VI) based on the leaching of gold nanoparticles using a paper-based sensor. *Talanta* **2016**, *161*, 819-825.
- (5) Tao, H. L.; Xu, M. Z.; Zhang, Q. J.; Zhang X. H.; Li, S. H.; Zhong, F. X.; Sun, C.; Liao, X. F. Determination of Cr(vi) in *Leersia hexandra* Swartz based on the efficient fluorescence energy transfer between CdTe@SiO<sub>2</sub> nanoparticles and Rhodamine B. *Analytical Methods* **2013**, *5*, 5961-5968.
- (6) Zheng, A.; Chen, J.; Wu, G.; Wu, G.; Zhang, Y. G.; Wei, H. A novel fluorescent distinguished probe for Cr (VI) in aqueous solution. *Spectrochim Acta A Mol Biomol Spectrosc* **2009**, *74*, 265-270.
- (7) Zhang, Z.; Sha, C.; Liu, A.; Zhang, Z.; Xu, D. Highly Selective Detection of Cr(VI) in Water Matrix by a Simple 1,8-Naphthalimide-Based Turn-On Fluorescent Sensor. *Journal of Fluorescence* **2015**, *25*, 335-340.
- (8) Cai, F.; Liu, X.; Liu, S.; Liu, H.; Huang, Y. A simple one-pot synthesis of highly fluorescent nitrogen-doped graphene quantum dots for the detection of Cr(vi) in aqueous media. *RSC Advances* **2014**, *4*, 52016-52022.
- (9) Cui, M.; Song, G.; Wang, C.; Song, Q. Synthesis of cysteine-functionalized water-soluble luminescent copper nanoclusters and their application to the determination of chromium(VI). *Microchimica Acta* **2015**, *182*, 1371-1377.
- (10) Rong, M.; Lin, L.; Song, X.; Wang, Y.; Zhong, Y.; Yan, J.; Feng, Y.; Zeng, X.; Chen, X. Fluorescence sensing of chromium (VI) and ascorbic acid using graphitic carbon nitride nanosheets as a fluorescent “switch”. *Biosensors and Bioelectronics* **2015**, *68*, 210-217.
- (11) Guo, J. F.; Hou, C. J.; Yang, M.; Hou, D. Q.; Fa, H. B. Ultra-sensitive fluorescence determination of chromium(vi) in aqueous solution based on



selectively etching of protein-stabled gold nanoclusters. *RSC Advances* **2016**, *6*, 104693-104698.
